# Supplementary material for: Maternal-Fetal Immune Responses in Pregnant Women Infected with SARS-CoV-2
Source: Res Sq. 2021 Mar 31:rs.3.rs-362886. Preprint. [Version 1] doi: 10.21203/rs.3.rs-362886/v1 (PMC8020997; doi:10.21203/rs.3.rs-362886/v1)
Supplement: Supplement [file dd8daaa55659f72c4c13b847.xlsx]

## Sheet: SIG.combined.2020-11-28
Table S3
Differentially expressed genes (DEGs) between SARS-CoV-2 (+) and pregnant healthy women across cell types, compartments, and maternal/fetal origin using DESeq2. Each column represents, the ENSEMBL gene ID, baseline mean gene expression, log2 fold change, standard error, nominal p-value, FDR adjusted p-value, gene symbol, and the (cell type, location, origin) combination in which each gene was tes…
Ensemble ID	baseMean	log2FoldChange	lfcSE	p-value	Adjusted p	Gene Name	Location_CellType_Origin
ENSG00000124225.16	43.5558	-1.5954	0.232523	6.82597e-12	5.45736e-08	PMEPA1	CAM_T-cell_M
ENSG00000136603.14	86.2819	-0.893563	0.169801	1.42184e-07	0.000513308	SKIL	CAM_T-cell_M
ENSG00000240065.8	100.697	0.97047	0.186402	1.92611e-07	0.000513308	PSMB9	CAM_T-cell_M
ENSG00000183615.6	14.2778	-2.08703	0.384464	5.68549e-08	0.000667591	FAM167B	CAM_LED_M
ENSG00000177674.16	25.9489	1.35483	0.279617	1.26423e-06	0.00252689	AGTRAP	CAM_T-cell_M
ENSG00000265972.5	29.4328	1.50902	0.300166	4.9748e-07	0.00312766	TXNIP	CAM_Macrophage-2_M
ENSG00000082512.15	13.8606	-1.46316	0.307059	1.8877e-06	0.00704679	TRAF5	CAM_Macrophage-1_M
ENSG00000069849.11	230.552	-0.777734	0.170669	5.18955e-06	0.00747128	ATP1B3	CAM_T-cell_M
ENSG00000179115.11	7.82452	2.00336	0.441201	5.60696e-06	0.00747128	FARSA	CAM_T-cell_M
ENSG00000120875.9	15.3576	-1.66668	0.357504	3.1319e-06	0.00984512	DUSP4	CAM_Macrophage-2_M
ENSG00000075142.13	73.9533	0.771726	0.175038	1.03895e-05	0.0118663	SRI	CAM_T-cell_M
ENSG00000163563.8	32.0746	1.17372	0.259346	6.02016e-06	0.0126162	MNDA	CAM_Macrophage-2_M
ENSG00000130724.8	46.4939	0.909334	0.212706	1.91081e-05	0.0152769	CHMP2A	CAM_T-cell_M
ENSG00000117748.10	18.9006	1.22109	0.284139	1.72733e-05	0.0152769	RPA2	CAM_T-cell_M
ENSG00000169019.11	11.7377	1.61003	0.374463	1.71138e-05	0.0152769	COMMD8	CAM_T-cell_M
ENSG00000163563.8	24.0043	1.15309	0.261916	1.06991e-05	0.0199699	MNDA	CAM_Macrophage-1_M
ENSG00000159199.14	46.1154	0.844311	0.202537	3.0638e-05	0.0222683	ATP5MC1	CAM_T-cell_M
ENSG00000107130.10	15.6063	-1.60116	0.374452	1.90272e-05	0.0228961	NCS1	CAM_Macrophage-1_M
ENSG00000088826.18	17.9515	-1.48204	0.355486	3.05865e-05	0.0228961	SMOX	CAM_Macrophage-1_M
ENSG00000112394.17	26.0689	-1.38724	0.333685	3.21988e-05	0.0228961	SLC16A10	CAM_Macrophage-1_M
ENSG00000124225.16	15.4306	-1.09815	0.266108	3.68006e-05	0.0228961	PMEPA1	CAM_Macrophage-1_M
ENSG00000120875.9	24.1056	-1.18324	0.289483	4.36223e-05	0.0232632	DUSP4	CAM_Macrophage-1_M
ENSG00000116667.14	8.9635	-1.73851	0.406121	1.86258e-05	0.02342	C1orf21	CAM_Macrophage-2_M
ENSG00000140367.11	19.0443	-1.23228	0.287845	1.85999e-05	0.02342	UBE2Q2	CAM_Macrophage-2_M
ENSG00000225972.1	14.3682	3.34591	0.707749	2.27261e-06	0.0282576	MTND1P23	CAM_Stromal-3_F
ENSG00000166523.7	23.9946	1.44437	0.36099	6.30369e-05	0.0294146	CLEC4E	CAM_Macrophage-1_M
ENSG00000136689.18	49.5765	-0.937953	0.223961	2.814e-05	0.0294861	IL1RN	CAM_Macrophage-2_M
ENSG00000169715.14	7.10166	-2.4002	0.5059	2.091e-06	0.0295334	MT1E	PVBP_npiCTB_F
ENSG00000101246.20	11.0891	1.33644	0.327504	4.4902e-05	0.0299159	ARFRP1	CAM_T-cell_M
ENSG00000222041.11	27.6103	-1.24782	0.301683	3.53114e-05	0.0317147	CYTOR	CAM_Macrophage-2_M
ENSG00000184220.12	17.3296	-1.8582	0.476531	9.64212e-05	0.0399934	CMSS1	CAM_Macrophage-1_M
ENSG00000262814.8	16.2241	1.16196	0.294266	7.85842e-05	0.0483293	MRPL12	CAM_T-cell_M
ENSG00000184220.12	20.2438	-1.24885	0.317717	8.46962e-05	0.0483676	CMSS1	CAM_T-cell_M
ENSG00000109320.13	92.6122	-0.677533	0.173225	9.18023e-05	0.0489306	NFKB1	CAM_T-cell_M
ENSG00000130775.16	53.7428	0.817786	0.205208	6.74375e-05	0.0529974	THEMIS2	CAM_Macrophage-2_M
ENSG00000109472.14	9.03587	-2.68396	0.606006	9.46998e-06	0.0555983	CPE	CAM_LED_M
ENSG00000121851.13	26.1816	0.981507	0.254393	0.000114209	0.0570688	POLR3GL	CAM_T-cell_M
ENSG00000163565.18	42.5831	0.869838	0.223285	9.79399e-05	0.0615748	IFI16	CAM_Macrophage-2_M
ENSG00000123095.6	13.2879	1.40368	0.358411	8.98841e-05	0.0615748	BHLHE41	CAM_Macrophage-2_M
ENSG00000169715.14	10.6113	-2.19156	0.476619	4.26264e-06	0.0632936	MT1E	PVBP_CTB_F
ENSG00000091972.18	21.4534	1.75463	0.39159	7.43712e-06	0.0632936	CD200	PVBP_CTB_F
ENSG00000121579.13	47.4351	-0.883516	0.229048	0.000114626	0.065514	NAA50	CAM_Macrophage-2_M
ENSG00000243927.6	69.2152	-0.879501	0.230222	0.000133329	0.0698534	MRPS6	CAM_Macrophage-2_M
ENSG00000197696.10	7.45785	-2.38293	0.528061	6.40367e-06	0.0703123	NMB	CAM_Monocyte_M
ENSG00000182866.17	102.091	0.565681	0.149217	0.000150045	0.0705652	LCK	CAM_T-cell_M
ENSG00000167797.7	90.7755	-0.699599	0.185912	0.000167838	0.0745482	CDK2AP2	CAM_T-cell_M
ENSG00000006327.13	44.7429	-1.05915	0.280117	0.000156149	0.075516	TNFRSF12A	CAM_Macrophage-2_M
ENSG00000123095.6	11.8596	1.36103	0.367306	0.000211024	0.0787754	BHLHE41	CAM_Macrophage-1_M
ENSG00000186665.9	25.201	0.839684	0.197252	2.07262e-05	0.0811224	C17orf58	CAM_LED_M
ENSG00000160588.10	22.7761	-1.04523	0.282419	0.000214772	0.0823657	MPZL3	CAM_T-cell_M
ENSG00000137078.9	26.704	0.992012	0.267703	0.000210861	0.0823657	SIT1	CAM_T-cell_M
ENSG00000068079.7	25.1465	1.07956	0.292068	0.000218784	0.0823657	IFI35	CAM_T-cell_M
ENSG00000139641.12	9.13559	1.59116	0.431524	0.000226647	0.0823657	ESYT1	CAM_T-cell_M
ENSG00000137801.10	3.98068	-2.79243	0.76612	0.000267493	0.0868076	THBS1	CAM_T-cell_M
ENSG00000104823.9	69.5945	0.689933	0.189483	0.000271443	0.0868076	ECH1	CAM_T-cell_M
ENSG00000123353.10	13.4758	1.03259	0.282885	0.000262015	0.0868076	ORMDL2	CAM_T-cell_M
ENSG00000171604.12	33.9316	-1.04226	0.280946	0.000207403	0.0878937	CXXC5	CAM_Macrophage-2_M
ENSG00000163154.6	5.99812	1.91184	0.515734	0.000209703	0.0878937	TNFAIP8L2	CAM_Macrophage-2_M
ENSG00000088826.18	22.4825	-1.22067	0.331038	0.00022657	0.0890278	SMOX	CAM_Macrophage-2_M
ENSG00000168672.4	7.83841	-1.78458	0.496363	0.000324015	0.0901011	LRATD2	CAM_T-cell_M
ENSG00000243927.6	134.665	-0.939767	0.259575	0.000294141	0.0901011	MRPS6	CAM_T-cell_M
ENSG00000165929.13	45.8419	-0.916477	0.254014	0.000308594	0.0901011	TC2N	CAM_T-cell_M
ENSG00000187024.14	4.70849	2.34864	0.653662	0.000326821	0.0901011	PTRH1	CAM_T-cell_M
ENSG00000078319.9	2.8233	2.62284	0.733811	0.0003512	0.0935948	PMS2P1	CAM_T-cell_M
ENSG00000169756.16	86.8936	-0.565643	0.155566	0.000276871	0.09396	LIMS1	CAM_Macrophage-1_M
ENSG00000217801.10	21.0342	-1.20039	0.334648	0.000334461	0.0960419	AL390719.1	CAM_Macrophage-1_M
ENSG00000243927.6	63.7376	-0.912445	0.254054	0.000328732	0.0960419	MRPS6	CAM_Macrophage-1_M
ENSG00000130755.13	181.379	0.550669	0.154888	0.000377582	0.0973796	GMFG	CAM_T-cell_M
ENSG00000170270.5	9.86597	-1.14073	0.31424	0.000283288	0.099445	GON7	CAM_Macrophage-2_M
ENSG00000137309.19	57.9144	-0.653669	0.180132	0.000284716	0.099445	HMGA1	CAM_Macrophage-2_M
